# Supplementary material for: Mesenchymal Phenotype of CTC-Enriched Blood Fraction and Lymph Node Metastasis Formation Potential
Source: PLOS journal article supplement (doi:10.1371/journal.pone.0093901), 2014-04-07
Supplement: S1 (10.1371/journal.pone.0093901.s001) [file journal.pone.0093901.s001]

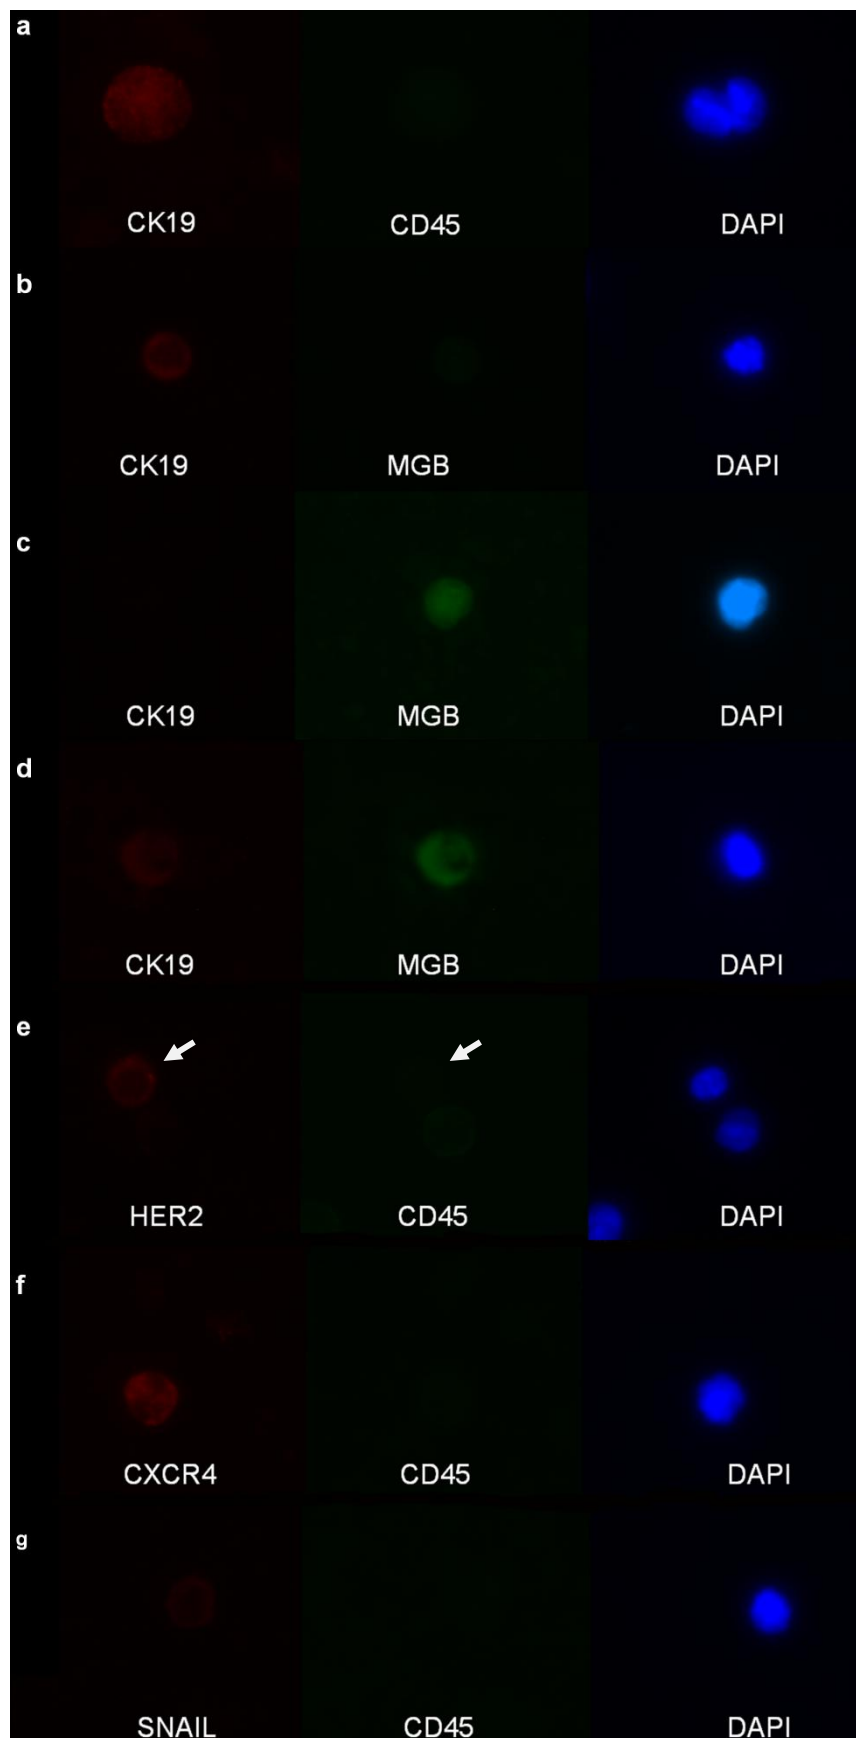

**Figure S1. Exemplary photos of immunostained cells in CTC-enriched blood fractions of breast cancer patients.** Each panel (a-g) represents results of double immunostaining with appropriated antibodies and DAPI. Following immunophenotypes are presented a) CK19+/CD45- b) CK19+/MGB1- c) CK19-/MGB1+ d) CK19+/MGB1+ e) HER2+/CD45- (marked with an arrow) f) CXCR4+/CD45- g) SNAIL+/CD45-.
